# Supplementary material for: Survey on Use of Local and Systemic Corticosteroids in the Management of Chronic Rhinosinusitis with Nasal Polyps: Identification of Unmet Clinical Needs
Source: MDPI journal article supplement (doi:10.3390/jpm12060897), 2022-05-29
Supplement: s1 [file s1]

# QUESTIONNAIRE ON USE OF TOPICAL AND SYSTEMIC CORTICOSTEROIDS IN THE MANAGEMENT OF CHRONIC RHINOSINUSITIS WITH NASAL POLYPS (CRSwNP)

## USE OF INTRANASAL TOPICAL CORTICOSTEROIDS (OCS) IN PATIENTS WITH CRSwNP

Q1. WHICH LOCAL CORTICOSTEROID DO YOU MOST FREQUENTLY PRESCRIBE FOR TREATMENT OF CRSwNP IN YOUR PRACTICE?

| Options                                    | Answers% | Answers n. |
|--------------------------------------------|----------|------------|
| Budesonide                                 | 28.97%   | 126        |
| Fluticasone                                | 8.51%    | 37         |
| Mometasone furoate                         | 79.31%   | 345        |
| Tiamcinolone Acetonide                     | 0.69%    | 3          |
| Fluticasone in combination with azelastine | 9.43%    | 41         |
| Beclometasone dipropionate                 | 10.80%   | 47         |
| Other                                      | 1.15%    | 5          |
|                                            |          | Total: 435 |

Q2. WHAT METHOD OF ADMINISTRATION FOR LOCAL CORTICOSTEROIDS DO YOU MOST FREQUENTLY PRESCRIBE IN PATIENTS WITH CRSwNP?

| Options                                   | Answers% | Answers n. |
|-------------------------------------------|----------|------------|
| Nasal spray                               | 98.62%   | 430        |
| Nasal drops                               | 1.15%    | 5          |
| Nasal washes (e.g. Rinowash)              | 16.97%   | 74         |
| Aerosol                                   | 5.73%    | 25         |
| Squeeze bottle (e.g. Rinoway/sinus rinse) | 5.96%    | 26         |
| Other                                     | 0.92%    | 4          |
|                                           |          | Total: 436 |

Q.3 IN YOUR PRACTICE, IN GENERAL, DO YOU ASSOCIATE LOCAL CORTICOSTEROIDS WITH NASAL WASHES OF PHYSIOLOGICAL SOLUTION?

| Options                                       | Answers% | Answers n. |
|-----------------------------------------------|----------|------------|
| Yes, always at the same time of the day       | 50.69%   | 221        |
| Yes, always but at different times of the day | 25.46%   | 111        |
| Only in selected cases                        | 18.12%   | 79         |
| No, never                                     | 4.13%    | 18         |
| Other                                         | 1.61%    | 7          |
|                                               |          | Total: 436 |

Q4. HOW LONG DO YOU RECOMMEND TREATMENT WITH A LOCAL CORTICOSTEROID IN PATIENTS WITH CRwNP AT THE FIRST EVALUATION BEFORE THE NEXT VISIT?

| Options                           | Answers% | Answers n. |
|-----------------------------------|----------|------------|
| Short period of time (one month)  | 6.88%    | 30         |
| Short period of time (two months) | 13.30%   | 58         |
| Short period of time (<3 months)  | 13.07%   | 57         |
| Long period of time (>3 months)   | 41.28%   | 180        |
| Long period of time (>6 months)   | 12.61%   | 55         |
| Long period of time (12 months)   | 8.94%    | 39         |
| Other                             | 3.90%    | 17         |
|                                   |          | Total: 436 |

Q5. AT WHAT FREQUENCY DO YOU RECOMMEND A LOCAL CORTICOSTEROID IN PATIENTS WITH CRSwNP?

| Options                    | Answers% | Answers n. |
|----------------------------|----------|------------|
| Every day                  | 61.93%   | 270        |
| Alternate days             | 1.38%    | 6          |
| Alternate weeks            | 2.06%    | 9          |
| 15 days on and 15 days off | 19.95%   | 87         |
| Alternate months           | 4.82%    | 21         |
| Other                      | 9.86%    | 43         |
|                            |          | Total: 436 |

Q6. IN YOUR EXPERIENCE, WHAT PERCENTAGE OF PATIENTS ADHERE TO INTRANASAL CORTICOSTEROID THERAPY AND LONG-TERM NASAL WASHINGS (>3 MONTHS)?

| Options | Answers% | Answers n. |
|---------|----------|------------|
| >90%    | 18.58%   | 81         |
| 70%     | 43.35%   | 189        |
| 50%     | 30.50%   | 133        |
| 30%     | 4.59%    | 20         |
| <30%    | 2.52%    | 11         |
| Other   | 0.46%    | 2          |
|         |          | Total: 436 |

Q7. DO YOU AGREE WITH THE STATEMENT "PROLONGED USE (> 3 MONTHS) OF INTRANASAL CORTICOSTEROIDS IS BURDENED BY MINIMAL LOCAL SIDE EFFECTS (EPISTAXIS) AND FEW/NO SYSTEMIC SIDE EFFECTS (E.G.: DIABETES, ALTERATIONS OF THE HYPOTHALAMUS-PITUITARY AXIS)"?

| Options            | Answers% | Answers n. |
|--------------------|----------|------------|
| Fully agree        | 69.95%   | 305        |
| Partially agree    | 20.87%   | 91         |
| Partially disagree | 5.05%    | 22         |
| Fully disagree     | 4.59%    | 20         |
| Other              | 4.13%    | 18         |
|                    |          | Total: 436 |

Q8. WHEN PRESCRIBING A TOPICAL CORTICOSTEROID, WHICH OF THE FOLLOWING DO YOU PAY ATTENTION TO?

| Options                                                       | Answers% | Answers n. |
|---------------------------------------------------------------|----------|------------|
| How to use the nasal spray                                    | 0.69%    | 3          |
| How to position the device                                    | 58.62%   | 255        |
| Position of the body                                          | 33.33%   | 145        |
| Time of day to administer it                                  | 39.77%   | 173        |
| When to do it with respect to nasal washing (before or after) | 68.51%   | 298        |
| Other                                                         | 2.53%    | 11         |
|                                                               |          | Total: 435 |

Q9. DO YOU AGREE WITH THE STATEMENT "IN CLINICAL PRACTICE, IT IS INDICATED TO MODULATE CORTICOSTEROID THERAPY BASED ON SEVERITY OF SYMPTOMS"? MODULATION MEANS BOTH DRUG DISCONTINUATION FOR SHORT PERIODS (EVERY OTHER DAY, 20 DAYS ON AND 10 DAYS OFF) AND MODULATING THE DAILY DOSE (TWICE PER DAY OR ONCE PER DAY)?

| Options            | Answers% | Answers n. |
|--------------------|----------|------------|
| Fully agree        | 63.91%   | 278        |
| Partially agree    | 28.51%   | 124        |
| Partially disagree | 5.06%    | 22         |
| Fully disagree     | 63.91%   | 278        |
| Other              | 2.53%    | 11         |
|                    |          | Total: 435 |

Q10. IN YOUR CLINICAL PRACTICE, WHAT IS THE MOST COMMON EXTRANASAL OR SYSTEMIC SIDE EFFECT DURING PROLONGED USE (>3 MONTHS) OF LOCAL INTRANASAL CORTICOSTEROIDS?

| Options                                                                | Answers% | Answers n. |
|------------------------------------------------------------------------|----------|------------|
| Alterations in glucose metabolism (diabetes, carbohydrate intolerance) | 4.60%    | 20         |
| Alterations in bone metabolism (osteopenia, osteoporosis)              | 1.61%    | 7          |
| Mood alterations                                                       | 3.45%    | 15         |
| Increased appetite                                                     | 0.92%    | 4          |
| Insomnia                                                               | 5.98%    | 26         |
| Hypertension                                                           | 8.74%    | 38         |
| Adrenal suppression                                                    | 0.69%    | 3          |
| No systemic effects                                                    | 78.85%   | 343        |
| Other                                                                  | 4.83%    | 21         |
|                                                                        |          | Total: 435 |

Q11. WHAT ADVERSE EFFECTS DID YOU MOST FREQUENTLY SEE AFTER PROLONGED USED OF LOCAL INTRANASAL CORTICOSTEROIDS?

| Options                           | Answers% | Answers n. |
|-----------------------------------|----------|------------|
| Epistaxis                         | 76.38%   | 333        |
| Craniofacial pain and/or headache | 2.06%    | 9          |
| Hyposmia                          | 1.38%    | 6          |
| Hiccups                           | 7.34%    | 32         |
| Nasal dryness                     | 70.41%   | 307        |
| Increase in ocular pressure       | 5.96%    | 26         |
| Cataract                          | 0.46%    | 2          |
| Nasal crusting                    | 14.91%   | 65         |
| Septal perforation                | 0.23%    | 1          |
| Mucosal atrophy                   | 10.78%   | 47         |
| No local effects                  | 4.82%    | 21         |
| Other                             | 1.15%    | 5          |
|                                   |          | Total: 436 |

Q12. WHICH OF THESE FACTORS DO YOU SEE AS A CONTRAINDICATION TO THE USE OF TOPICAL NASAL CORTICOSTEROIDS?

| Options            | Answers% | Answers n. |
|--------------------|----------|------------|
| Risk of hemorrhage | 44.19%   | 190        |
| Hypertension       | 7.44%    | 32         |
| Glaucoma           | 59.07%   | 254        |
| Cataract           | 5.81%    | 25         |
| Diabetes           | 10.93%   | 47         |
| Immunosuppression  | 11.63%   | 50         |
| Herpes simplex     | 29.07%   | 125        |
| Other              | 5.58%    | 24         |
|                    |          | Total: 430 |

Q13. WHICH OF THESE STRATEGIES MAY REDUCE THE RISK OF ADVERSE EVENTS WITH LOCAL NASAL CORTICOSTEROIDS?

| Options                                                  | Answers% | Answers n. |
|----------------------------------------------------------|----------|------------|
| Teach the patient how to use it correctly                | 49.89%   | 217        |
| Discontinue the drug for at least 10 days per month      | 39.31%   | 171        |
| Administration in alternate weeks                        | 3.68%    | 16         |
| Administration 15 days yes and 15 no                     | 15.40%   | 67         |
| Administration in alternate days                         | 58.39%   | 254        |
| Use of adjuvant drugs (hyaluronic acid, emollients etc.) | 49.89%   | 217        |
| None of the above                                        | 3.91%    | 17         |
| Other                                                    | 1.61%    | 7          |
|                                                          |          | Total: 435 |

Q14. PRIOR TO SURGERY, DO YOU DISCONTINUE TOPICAL NASAL CORTICOSTEROID THERAPY?

| Options                                                     | Answers% | Answers n. |
|-------------------------------------------------------------|----------|------------|
| No, I have the patient take it until the day of the surgery | 71.66%   | 311        |
| Yes, at least one week before                               | 23.96%   | 104        |
| Yes, one month before                                       | 2.76%    | 12         |
| Yes, three months before                                    | 0.23%    | 1          |
| Other                                                       | 1.38%    | 6          |
|                                                             |          | Total: 434 |

Q15. WHEN DO YOU THINK IT APPROPRIATE TO START INTRANASAL TOPICAL CORTICOSTEROID AFTER FESS?

| Options                                                                        | Answers% | Answers n. |
|--------------------------------------------------------------------------------|----------|------------|
| In the immediate post-operative period after possible removal of nasal packing | 7.37%    | 32         |
| As soon as the mucosa in the entire nasal cavity has recovered.                | 29.03%   | 126        |
| 1 week after intervention                                                      | 4.61%    | 20         |
| 15 days after intervention                                                     | 15.90%   | 69         |
| 1 month                                                                        | 24.19%   | 105        |
| 2 months                                                                       | 3.92%    | 17         |
| 3 months                                                                       | 4.15%    | 18         |
| 6 months                                                                       | 0.69%    | 3          |
| Only if recurrence occurs during follow-up                                     | 9.22%    | 40         |
| Other                                                                          | 0.92%    | 4          |
|                                                                                |          | Total: 434 |

#### USE OF SYSTEMIC CORTICOSTEROIDS (OCS) IN TREATMENT OF CRSWNP

Q16. WHICH SYSTEMIC CORTISONE DO YOU MOST FREQUENTLY PRESCRIBE TO TREAT RECURRENCES?

| Options            | Answers% | Answers n. |
|--------------------|----------|------------|
| Prednisone         | 45.73%   | 198        |
| Prednisolone       | 10.16%   | 44         |
| Methylprednisolone | 19.63%   | 85         |
| Deflazacort        | 38.80%   | 168        |
| Hydrocortisone     | 1.15%    | 5          |
| Betamethasone      | 11.55%   | 50         |
| Triamcinolone      | 8.55%    | 37         |
| Other              | 2.31%    | 10         |
|                    |          | Total: 433 |

Q17. WHEN DO YOU THINK IT NECESSARY TO PRESCRIBE A SHORT COURSE OF ORAL STEROIDS IN THE MEDICAL TREATMENT OF CRSwNP?

| Options                                                                         | Answers% | Answers n. |
|---------------------------------------------------------------------------------|----------|------------|
| Whenever there is a clinical exacerbation of symptoms, regardless of the number | 20.28%   | 88         |
| In case of exacerbation, trying not to exceed 2 cycles per year                 | 41.01%   | 178        |
| In case of exacerbation, trying not to exceed 3 cycles per year                 | 13.36%   | 58         |
| In case of exacerbation, trying not to exceed 4 cycles per year                 | 3.00%    | 13         |
| Once a month for 5 consecutive days each month                                  | 1.15%    | 5          |
| Once a month for 7 consecutive days each month                                  | 19.12%   | 83         |
| Other                                                                           | 2.07%    | 9          |
|                                                                                 |          | Total: 434 |

Q18. IN THE CASE THAT IT IS NECESSARY TO PRESCRIBE A SHORT COURSE OF SYSTEMIC STEROIDS, WHAT DOSE DO YOU USUALLY PRESCRIBE TAKING PREDNISONE AS A REFERENCE?

| Options                                   | Answers% | Answers n. |
|-------------------------------------------|----------|------------|
| 50 mg per day regardless of weight        | 11.32%   | 49         |
| 25 mg per day regardless of weight        | 47.11%   | 204        |
| 10 mg per day regardless of weight        | 5.08%    | 22         |
| 5 mg per day regardless of weight         | 2.54%    | 11         |
| I tailor the dose to the patient's weight | 31.41%   | 136        |
| Other                                     | 2.54%    | 11         |
|                                           |          | Total: 433 |

Q19. IF IT IS NECESSARY TO PRESCRIBE A SHORT COURSE OF SYSTEMIC STEROIDS IN A PATIENT WITH CRSwNP, FOR HOW MANY DAYS DO YOU ADMINISTER IT?

| Options    | Answers% | Answers n. |
|------------|----------|------------|
| <5 days    | 3.23%    | 14         |
| 5-10 days  | 62.44%   | 271        |
| 10-15 days | 27.42%   | 119        |
| 15-20 days | 5.76%    | 25         |
| 20-25 days | 0.23%    | 1          |
| 25-30 days | 0.69%    | 3          |
| Other      | 0.23%    | 1          |
|            |          | Total: 434 |

Q20. IN YOUR OPINION, WHICH OF THE FOLLOWING CAN BE USED TO DEFINE SEVERE UNCONTROLLED DISEASE?

| Options                                                                       | Answers% | Answers n. |
|-------------------------------------------------------------------------------|----------|------------|
| At least one short course of systemic steroids per year in the last two years | 4.14%    | 18         |
| At least two short courses of systemic steroids in the last year              | 22.07%   | 96         |
| At least three short courses of systemic cortisone in the last year           | 41.38%   | 180        |
| At least four short courses of systemic cortisone in the last year            | 32.41%   | 141        |
|                                                                               |          | Total: 435 |

Q21. DO YOU AGREE WITH THE FOLLOWING STATEMENT? (IN MEDICAL TREATMENT OF CRSwNP IT IS PREFERABLE TO AVOID LONG-TERM LOW-DOSE ADMINISTRATION OF SYSTEMIC CORTICOSTEROIDS)

| Options            | Answers% | Answers n. |
|--------------------|----------|------------|
| Fully agree        | 54.73%   | 237        |
| Partially agree    | 31.87%   | 138        |
| Partially disagree | 10.39%   | 45         |
| Fully disagree     | 3.00%    | 13         |
|                    |          | Total: 433 |

Q22. DO YOU PRESCRIBE SYSTEMIC DEPOT STEROIDS (E.G. TRIAMCINOLONE ACETONIDE) IN YOUR CLINICAL PRACTICE TO TREAT CRSwNP?

| Options                                                          | Answers% | Answers n. |
|------------------------------------------------------------------|----------|------------|
| Prefer not to prescribe them                                     | 35.88%   | 155        |
| Never prescribed them                                            | 35.88%   | 155        |
| In case of non-response to oral corticosteroids                  | 12.04%   | 52         |
| In management of simple forms/those not indicated for surgery    | 4.63%    | 20         |
| For rapid control of symptoms                                    | 12.73%   | 55         |
| For rapid recovery of olfaction                                  | 4.17%    | 18         |
| Only in cases of non-response to a single dose of oral cortisone | 9.72%    | 42         |
| In the long-term management of CRSwNP                            | 6.25%    | 27         |
|                                                                  |          | Total: 432 |

Q23. DO YOU AGREE WITH THE FOLLOWING STATEMENT? (THE INTERNATIONAL LITERATURE PROVIDES CLEAR GUIDELINES REGARDING THE POSOLOGY OF ORAL STEROIDS IN THE TREATMENT OF CRSwNP).

| Options            | Answers% | Answers n. |
|--------------------|----------|------------|
| Fully agree        | 19.03%   | 82         |
| Partially agree    | 56.84%   | 245        |
| Partially disagree | 17.40%   | 75         |
| Fully disagree     | 6.73%    | 29         |
|                    |          | Total: 431 |



Q24. DO YOU PRESCRIBE SYSTEMIC CORTICOSTEROID THERAPY PRIOR TO SURGERY? (E.G.: 5 DAYS BEFORE SURGERY)

| Options                               | Answers% | Answers n. |
|---------------------------------------|----------|------------|
| No                                    | 29.79%   | 129        |
| Yes always                            | 24.71%   | 107        |
| Yes, but based on severity of disease | 42.03%   | 182        |
| Only in cases of recurrence           | 1.85%    | 8          |
| Other                                 | 1.62%    | 7          |
|                                       |          | Total: 433 |

Q25. IN THE EVENT OF COMORBIDITIES AT RISK FOR THE ADMINISTRATION OF SYSTEMIC CORTICOSTEROIDS (HYPERTENSION, GLAUCOMA, DIABETES, GASTRITIS, ETC.) HOW DO YOU MANAGE EXACERBATION OF SYMPTOMS IN CRSwNP?

| Options                                                                   | Answers% | Answers n. |
|---------------------------------------------------------------------------|----------|------------|
| Absolutely avoid prescribing systemic corticosteroids                     | 14.62%   | 63         |
| Proceed with long-term low-dose administration                            | 7.66%    | 33         |
| Use a systemic corticosteroid with low mineralocorticoid activity         | 17.87%   | 77         |
| Proceed with the prescription with strict monitoring for adverse events   | 28.54%   | 123        |
| Increase the dose of local corticosteroid therapy                         | 11.14%   | 48         |
| Use other medications such as antihistamine, antileukotriene agents, etc. | 18.79%   | 81         |
| Other                                                                     | 1.39%    | 6          |
|                                                                           |          | Total: 431 |

Q26. WHAT ADVERSE EVENTS HAVE YOU MOST FREQUENTLY OBSERVED WITH SYSTEMIC STEROIDS?

| Options                                | Answers% | Answers n. |
|----------------------------------------|----------|------------|
| None                                   | 7.83%    | 34         |
| Hyperglycemia                          | 55.76%   | 242        |
| Gastric reflux                         | 29.49%   | 128        |
| Increased appetite                     | 12.67%   | 55         |
| Mood changes                           | 21.66%   | 94         |
| Insomnia                               | 50.00%   | 217        |
| Anxiety                                | 23.27%   | 101        |
| Cataract                               | 1.38%    | 6          |
| Glaucoma                               | 10.83%   | 47         |
| Hypertension                           | 57.60%   | 250        |
| Diabetes                               | 23.04%   | 100        |
| Increased susceptibility to infections | 3.69%    | 16         |
| Adrenal suppression                    | 2.30%    | 10         |
| Osteoporosis                           | 6.68%    | 29         |
| Other                                  | 1.15%    | 5          |

Total: 434

Q27. HOW DO YOU THINK IT IS APPROPRIATE TO EVALUATE SYSTEMIC CORTISONE USE OF PATIENTS WITH CRSwNP?

| Options                                                                                                      | Answers% | Answers n. |
|--------------------------------------------------------------------------------------------------------------|----------|------------|
| Consider the number of cycles that the patient has undergone in the last year                                | 62.59%   | 271        |
| Consider the total number of days in which the patient has taken a systemic cortisone in the last year       | 16.86%   | 73         |
| Consider the total dose that the patient has taken in the last year                                          | 17.78%   | 77         |
| Consider the number of cycles the patient has taken in the last six months                                   | 12.70%   | 55         |
| Consider the total number of days in which the patient has taken a systemic cortisone in the last six months | 6.47%    | 28         |
| Consider the total dose that the patient has taken in the last six months of the last year                   | 6.70%    | 29         |

Total: 433

Q28. WHAT ANNUAL DOSAGE OF SYSTEMIC CORTICOSTEROIDS DO YOU CONSIDER DANGEROUS DUE TO THE HIGH RISK OF ADVERSE EVENTS CONSIDERING TOTAL DAYS OF USE?

| Options                     | Answers% | Answers n. |
|-----------------------------|----------|------------|
| More than 3 weeks in a year | 11.34%   | 49         |
| More than 4 weeks in a year | 34.95%   | 151        |
| More than 5 weeks in a year | 10.88%   | 47         |
| More than 6weeks in a year  | 22.92%   | 99         |
| More than 7 weeks in a year | 3.01%    | 13         |
| More than 8 weeks in a year | 16.90%   | 73         |
|                             |          | Total: 432 |

Q29. WHAT TOTAL ANNUAL DOSE OF SYSTEMIC CORTICOSTEROIDS DO YOU CONSIDER DANGEROUS DUE TO THE HIGH RISK OF ADVERSE EVENTS (TOTAL AMOUNT CORTISONE IN MG TAKEN IN THE LAST YEAR)?

| Options               | Answers% | Answers n. |
|-----------------------|----------|------------|
| 200 mg of prednisone  | 3.97%    | 17         |
| 400 mg of prednisone  | 11.21%   | 48         |
| 800 mg of prednisone  | 18.93%   | 81         |
| 1000 mg of prednisone | 23.13%   | 99         |
| 1200 mg of prednisone | 7.94%    | 34         |
| 1400 mg of prednisone | 7.24%    | 31         |
| 1600 mg of prednisone | 8.41%    | 36         |
| 1800 mg of prednisone | 3.97%    | 17         |
| 2000 mg of prednisone | 11.21%   | 48         |
| Other                 | 3.97%    | 17         |
|                       |          | Total: 428 |

Q30. WHICH OF THE FOLLOWING DO YOU MONITOR FOR THE ONSET OF ADVERSE EVENTS RELATED TO ADMINISTRATION OF SYSTEMIC CORTICOSTEROID THERAPY AND/OR RECOMMEND TO THE PATIENT:

| Options                                      | Answers% | Answers n. |
|----------------------------------------------|----------|------------|
| Blood pressure                               | 90.99%   | 394        |
| Glycemia                                     | 87.53%   | 379        |
| Blood tests for levels of cortisol and ACTH  | 10.85%   | 47         |
| Recommend dosage of 24-hour urinary cortisol | 2.31%    | 10         |
| Refer to colleagues (endocrinologist, etc.)  | 18.01%   | 78         |
| Other ...                                    | 3.00%    | 13         |
|                                              |          | Total: 433 |

Q31. HAVE YOU EVER DISCONTINUED A SYSTEMIC CORTICOSTEROID IN YOUR PATIENTS? IF YES, FOR WHICH ADVERSE EVENTS?

| Options                                                 | Answers% | Answers n. |
|---------------------------------------------------------|----------|------------|
| Never                                                   | 23.33%   | 101        |
| Discontinued for osteoporosis                           | 4.39%    | 19         |
| Discontinued for hyperglycemia and/or diabetes mellitus | 43.19%   | 187        |
| Suspended for hypertensive peaks                        | 54.04%   | 234        |
| Discontinued for dyslipidemia, weight gain              | 2.08%    | 9          |
| Discontinued for gastritis and/or peptic ulcer          | 21.02%   | 91         |
| Discontinued for cataract, glaucoma                     | 11.78%   | 51         |
| Discontinued for anxiety, depression, sleep disturbance | 27.25%   | 118        |
| Discontinued for other reasons                          | 2.54%    | 11         |
| Other...                                                | 0.92%    | 4          |
|                                                         |          | Total: 433 |

Q32. BASED ON YOUR CLINICAL EXPERIENCE, WHAT PERCENTAGE OF PATIENTS ADHERE TO THE ORAL SYSTEMIC CORTICOSTEROID THERAPY PRESCRIBED?

| Options | Answers% | Answers n. |
|---------|----------|------------|
| 90 %    | 36.43%   | 157        |
| 70%     | 40.60%   | 175        |
| 50%     | 16.94%   | 73         |
| 30%     | 3.25%    | 14         |
| <30%    | 1.16%    | 5          |
| Other   | 1.62%    | 7          |
|         |          | Total: 431 |

Q33. IN THE EVENT THAT AN OLFACTORY DISORDER IS THE PREVALENT SYMPTOM ASSOCIATED WITH CRSwNP, DO YOU RECOMMEND A COURSE OF ORAL STEROID THERAPY?

| Options                                                                                | Answers% | Answers n. |
|----------------------------------------------------------------------------------------|----------|------------|
| Yes, always                                                                            | 27.55%   | 119        |
| No, never                                                                              | 6.25%    | 27         |
| Yes, but if the patient has already completed a course of local corticosteroid therapy | 49.07%   | 212        |
| Yes, but only if the patient refers anosmia                                            | 7.64%    | 33         |
| Yes, even if the patient refers hyposmia                                               | 7.64%    | 33         |
| Other                                                                                  | 1.85%    | 8          |
|                                                                                        |          | Total: 432 |

Q34. IF A PATIENT WITH CRSwNP COMPLAINS MAINLY OF OLFACTORY DISTURBANCES AND ORAL STEROID THERAPY IS INDICATED, FOR HOW MANY DAYS DO YOU PRESCRIBE IT?

| Options                                      | Answers% | Answers n. |
|----------------------------------------------|----------|------------|
| Short cycle of 7 days at full dosage per kg  | 49.31%   | 213        |
| Short course of 7-day low-dose therapy       | 13.19%   | 57         |
| Short cycle of 15 days at full dosage per kg | 22.22%   | 96         |
| Short 15-day low dose cycle                  | 8.56%    | 37         |
| 3-week full-dose cycle per kg                | 2.08%    | 9          |
| 3-week cycle at a reduced dose               | 0.69%    | 3          |
| One month of full-dose therapy per kg        | 0.46%    | 2          |
| One month of reduced dose therapy            | 0.46%    | 2          |
| Long-term low-dose cortisone                 | 0.46%    | 2          |
| Depot corticosteroid                         | 0.93%    | 4          |
| Other                                        | 1.62%    | 7          |
|                                              |          | Total: 432 |

Q35. IF A PATIENT WITH CRSwNP COMPLAINS MAINLY OF OLFACTORY DISTURBANCES AND ORAL STEROID THERAPY IS INDICATED, WHAT AGENT DO YOU USE MOST FREQUENTLY?

| Options             | Answers% | Answers n. |
|---------------------|----------|------------|
| Prednisone          | 45.14%   | 195        |
| Prednisolone        | 7.87%    | 34         |
| Deflazacort         | 29.17%   | 126        |
| Methyl prednisolone | 10.42%   | 45         |
| Betamethasone       | 5.56%    | 24         |
| Hydrocortisone      | 0.23%    | 1          |
| Other               | 1.62%    | 7          |
|                     |          | Total: 432 |

Q36. IN YOUR OPINION, WHAT IS THE EFFECTIVENESS OF OCS IN CLINICAL PRACTICE IN RESTORING OLFACTION IN CRSwNP?

| Options                                                                                    | Answers% | Answers n. |
|--------------------------------------------------------------------------------------------|----------|------------|
| Long-lasting improvement of smell                                                          | 15.38%   | 66         |
| Only temporary improvement of smell                                                        | 69.70%   | 299        |
| Insufficient recovery of smell in general                                                  | 9.79%    | 42         |
| Insufficient recovery of smell in patients with history of multiple surgical interventions | 3.73%    | 16         |
| Other                                                                                      | 1.40%    | 6          |
|                                                                                            |          | Total: 429 |

Q37. IN YOUR EXPERIENCE, IF A PATIENT HAS OLFACTORY RECOVERY WITH PREOPERATIVE OCS IS THIS PREDICTIVE OF GOOD OLFACTORY RECOVERY AFTER FESS?

| Options                                                             | Answers% | Answers n. |
|---------------------------------------------------------------------|----------|------------|
| No, never                                                           | 2.30%    | 10         |
| No, because I don't think it is predictive of olfactory recovery    | 16.36%   | 71         |
| I do not usually prescribe pre-operative cortisone                  | 14.29%   | 62         |
| Yes, because it means that the patient has a good olfactory reserve | 34.10%   | 148        |
| Yes, although it doesn't ensure long-lasting benefit                | 32.95%   | 143        |
|                                                                     |          | Total: 434 |

Q38. DO YOU AGREE WITH THE FOLLOWING STATEMENT: "IN THE EVALUATION OF CUMULATIVE ANNUAL DOSE OF OCS, IT SHOULD BE TAKEN INTO ACCOUNT THE OCS ADMINISTERED FOR ASTHMA"?

| Options                                                   | Answers% | Answers n. |
|-----------------------------------------------------------|----------|------------|
| Fully agree                                               | 68.28%   | 297        |
| Partially agree                                           | 25.29%   | 110        |
| Partially disagree                                        | 4.37%    | 19         |
| Disagree                                                  | 2.07%    | 9          |
| Only if I want to prescribe an oral steroid for sinusitis | 0.00%    | 0          |
| Never, since the steroid is prescribed for asthma         | 0.00%    | 0          |
|                                                           |          | Total: 435 |
